# Supplementary material for: Jellyfish Body Plans Provide Allometric Advantages beyond Low Carbon Content
Source: PLoS One. 2013 Aug 13;8(8):e72683. doi: 10.1371/journal.pone.0072683 (PMC3742524; doi:10.1371/journal.pone.0072683)
Supplement: Dataset S1 — Complete set of data used in analyses. (XLSX) [file pone.0072683.s003.xlsx]

## Sheet: Carbon & Nitrogen
Phylum	Class or Order	Species	Size	Units	WW or Vol	Units	ESD (cm)	C ind-1 (g)	N ind-1 (g)	Source
Cnidaria	Hydrozoa	Aeginura grimaldii	1.75	g WW	1.75	g	1.49507	0.0051821	0.0012859	1
Cnidaria	Hydrozoa	Aglantha digitale	60.67	mg DW	0.00110309	g	0.128193	5.72118e-06	2.99103e-06	2
Cnidaria	Hydrozoa	Botrynema brucei	5	g WW	5	g	2.12148	0.0118296	0.0034556	3
Cnidaria	Hydrozoa	Calycopsis borchgrevinki	4.5	g WW	4.5	g	2.04826	0.0226266	0.00543123	3
Cnidaria	Hydrozoa	Colobonema sericeum	13.71	g WW	13.71	g	2.96933	0.111281	0.0290871	1
Cnidaria	Hydrozoa	Diphyes antactica	1	g WW	1	g	1.24065	0.00417696	0.0012084	3
Cnidaria	Hydrozoa	Euphysa tentaculata	28.48	mg DW	0.000517818	g	0.0996293	1.66893e-06	3.87328e-07	4
Cnidaria	Hydrozoa	Phialidium sp.	350	mg DW	0.00636364	g	0.229911	6.783e-05	2.0475e-05	5
Cnidaria	Hydrozoa	Rathkea octopunctata	23.96	mg DW	0.000435636	g	0.0940524	6.00917e-06	3.8911e-06	4
Cnidaria	Hydrozoa	Sarsia princeps	29.84	mg DW	0.000542545	g	0.101191	1.99033e-06	6.714e-07	4
Cnidaria	Hydrozoa	Solmissus incisus	25.45	g WW	25.45	g	3.64929	0.015848	0.00435042	1
Cnidaria	Scyphozoa	Atolla wyvillei	45	g WW	45	g	4.41282	0.34472	0.08856	3
Cnidaria	Scyphozoa	Aurelia aurita	8488	mg DW	0.202095	g	0.728067	0.000201166	0.00015533	4
Cnidaria	Scyphozoa	Catostylus mosaicus	159	mm BD	1303.9	g	13.5536	15.2565	4.41303	Pitt unpubl.
Cnidaria	Scyphozoa	Chrysaora fuscescens	880	g WW	880	g	11.8887	2.46565		6
Cnidaria	Scyphozoa	Nemopilema nomurai	40	kg WW	40000	g	42.4282	219.52	45.08	Uye unpubl.
Cnidaria	Scyphozoa	Periphylla periphylla	1125	g WW	1125	g	12.903	7.1442		7
Cnidaria	Scyphozoa	Poralia rufescens	298.25	g WW	298.25	g	8.289	0.0709149	0.0168273	1
Cnidaria	Scyphozoa	Rhopilema esculentum	5	kg WW	5000	g	21.2143	60.5	11	Uye unpubl.
Cnidaria	Scyphozoa	Rhopilema hispidum	4	kg WW	4000	g	19.6936	30.368	7.696	Uye unpubl.
Ctenophora	Nuda	Beroe ovata	40	g WW	40	g	4.24292	0.06336		8
Ctenophora	Nuda	Beroe sp.	5.9	g WW	5.9	g	2.24181	0.0224997	0.0124562	3
Ctenophora	Nuda	Beroe sp.	15.93	g WW	15.93	g	3.12166	0.033265	0.0118201	9
Ctenophora	Nuda	Beroe sp.	401.58	mg DW	12.243	g	2.85943	0.0361422	0.00923634	10
Ctenophora	Tentaculata	Mnemiopsis leidyi	38	g WW	38	g	4.171	0.021964	0.00323	11
Ctenophora	Tentaculata	Mnemiopsis mccradyi	28	ml	28	g	3.76731	0.0236916	0.00272748	12
Ctenophora	Tentaculata	Bathocyroe fosteri	24.38	g WW	24.38	g	3.59741	0.00361	9.0206e-05	1
Ctenophora	Tentaculata	Ocyropsis spp.	33	mm BD	7.55104	g	2.43398	0.00347499	0.000883472	13
Ctenophora	Tentaculata	Ocryopsis maculata	70	mm	40.3914	g	4.25672	0.0357585	0.0100817	13
Ctenophora	Tentaculata	Eurhamphaea vexilligera	100	mm	45.9354	g	4.44318	0.015765	0.00429956	13
Ctenophora	Tentaculata	Agmayeria tortugensis	46.34	g WW	46.34	g	4.45619	0.437133	0.228501	1
Annelida	Polychaeta	Tomopteris carpenteri	137.93	mg DW	0.401146	cm3	0.914996	0.0481376	0.0114482	10
Arthropoda	Amphipoda	Cyphocaris challengeri	3.13	mg DW	0.0119723	cm3	0.283824	0.00143667	0.00019093	14
Arthropoda	Amphipoda	Hyperia gaudichaudii	105.3	mg DW	0.41067	cm3	0.922181	0.0492804	0.0074763	10
Arthropoda	Amphipoda	Parathemisto gaudichaudii	13.12	mg DW	0.0453733	cm3	0.442509	0.0054448	0.00097088	10
Arthropoda	Amphipoda	Parathemisto japonica	0.47	mg DW	0.00189567	cm3	0.153549	0.00022748	3.854e-05	14
Arthropoda	Amphipoda	Platyscelus serratulus	2.19	mg DW	0.00472675	cm3	0.208215	0.00056721	9.636e-05	14
Arthropoda	Amphipoda	Viblia antarctica	12.14	mg DW	0.0407702	cm3	0.427008	0.00489242	0.00099548	10
Arthropoda	Copepoda	Calanus cristatus	8.87	mg DW	0.0436108	cm3	0.436703	0.0052333	0.00052333	14
Arthropoda	Copepoda	Calanus lighti	0.13	mg DW	0.00052	cm3	0.099769	6.24e-05	1.651e-05	14
Arthropoda	Copepoda	Calanus pacificus	0.31	mg DW	0.00150867	cm3	0.142295	0.00018104	2.418e-05	14
Arthropoda	Copepoda	Calanus plumchrus	1.26	mg DW	0.006489	cm3	0.231411	0.00077868	8.82e-05	14
Arthropoda	Copepoda	Calanus propinquus	1.04	mg DW	0.00377867	cm3	0.193243	0.00045344	0.00013	10
Arthropoda	Copepoda	Candacia aetiopica	0.06	mg DW	0.000233	cm3	0.0763451	2.796e-05	7.56e-06	14
Arthropoda	Copepoda	Candacia columbiae	0.41	mg DW	0.00159217	cm3	0.144874	0.00019106	4.592e-05	14
Arthropoda	Copepoda	Disseta palumboi	0.52	mg DW	0.00221	cm3	0.161606	0.0002652	5.564e-05	14
Arthropoda	Copepoda	Eucalanus bungii bungii	1.09	mg DW	0.00453258	cm3	0.205324	0.00054391	8.284e-05	14
Arthropoda	Copepoda	Labidocera actifrons	0.25	mg DW	0.000954167	cm3	0.122143	0.0001145	3.225e-05	14
Arthropoda	Copepoda	Metridia gerlachei	0.265	mg DW	0.00100037	cm3	0.124084	0.000120045	3.021e-05	10
Arthropoda	Copepoda	Metridia okhotensis	0.51	mg DW	0.00269875	cm3	0.172735	0.00032385	2.958e-05	14
Arthropoda	Copepoda	Pareuchaeta birostrata	3.23	mg DW	0.0157193	cm3	0.310791	0.00188632	0.00022933	14
Arthropoda	Copepoda	Pleuromamma xiphias	0.23	mg DW	0.0009085	cm3	0.120162	0.00010902	0.0003013	14
Arthropoda	Copepoda	Pontellina plumata	0.03	mg DW	0.00011075	cm3	0.0595815	1.329e-05	3.66e-06	14
Arthropoda	Copepoda	Rhincalanus nasutus	0.14	mg DW	0.000609	cm3	0.105164	7.308e-05	1.386e-05	14
Arthropoda	Decapoda	Lucifer reynaudii	0.16	mg DW	0.000548	cm3	0.101529	6.576e-05	1.488e-05	14
Arthropoda	Decapoda	Chorismus antarcticus	2273	mg DW	7.7282	cm3	2.45286	0.927384	0.234119	9
Arthropoda	Euphausiacea	Euphausia crystallorophias	211	mg DW	0.796525	cm3	1.15005	0.095583	0.02321	9
Arthropoda	Euphausiacea	Euphausia pacifica	14	mg DW	0.0462	cm3	0.44518	0.005544	0.001414	14
Arthropoda	Euphausiacea	Euphausia superba	353.78	mg DW	1.40038	cm3	1.38803	0.168045	0.0364393	10
Arthropoda	Euphausiacea	Euphausia superba	431	mg DW	1.56597	cm3	1.44071	0.187916	0.046548	9
Arthropoda	Euphausiacea	Euphausia triacantha	22.97	mg DW	0.0788637	cm3	0.532043	0.00946364	0.00266452	10
Arthropoda	Euphausiacea	Tessarabrachion oculatus	14.45	mg DW	0.0568367	cm3	0.477014	0.0068204	0.001445	14
Arthropoda	Mysidacea	Antarctomysis maxima	721	mg DW	2.64968	cm3	1.71677	0.317961	0.075705	9
Arthropoda	Mysidacea	Siriella aequiremis	0.98	mg DW	0.00346267	cm3	0.187699	0.00041552	0.0001078	14
Mollusca	Cephalopoda	Psychroteuthis sp.	276	mg DW	1.3294	cm3	1.36417	0.159528	0.017664	9
Chaetognatha	Chaetognatha	Sagitta elegans	1.43	mg DW	0.00568425	cm3	0.221419	0.00068211	0.00010868	14
Chaetognatha	Chaetognatha	Sagitta nagae	1.33	mg DW	0.00482125	cm3	0.209594	0.00057855	0.00014763	14
Chordata	Pisces	Cyclothone alba	5.93	mg DW	0.0205079	cm3	0.339597	0.00246095	0.00066416	14
Chordata	Pisces	Engraulis japojnica	2.19	mg DW	0.00848625	cm3	0.253063	0.00101835	0.00027594	14
Chordata	Pisces	Maurolicus muelleri	396.16	mg DW	1.79593	cm3	1.50804	0.215511	0.0285235	14
Chordata	Pisces	Symbolophorus evermanni	18.6	mg DW	0.058745	cm3	0.482294	0.0070494	0.0018228	14

## Sheet: Respiration
Phylum	Class or Order	Species	Temp (°C)	Size as reported	Units	WW or vol	Units	ESD (cm)	Respiration as reported/calculated	Units	Respiration (ml O2 ind-1 h-1)	Source
Cnidaria	Hydrozoa	Aeginura grimaldii	6	1.75	g WW	1.75	g	1.49511	27.25	ml O2 h-1 g WW-1	0.0476945	1
Cnidaria	Hydrozoa	Aequorea victoria	10	290	mg DW	7	g	2.37323	0.11	ml O2 h-1 mg DW-1	0.0319	15
Cnidaria	Hydrozoa	Aglantha digitale	1.1	14	mg DW	2.98	g	1.78536	2.27	ml O2 ind-1 h-1	0.00227	16
Cnidaria	Hydrozoa	Aglantha digitale	10	6	mg DW	0.128	g	0.62532	0.93	ml O2 h-1 mg DW-1	0.00558	15
Cnidaria	Hydrozoa	Botrynema brucei	5	1.3299	g WW	1.33	g	1.36442	0.14	mmol O2 g-1 h-1	0.00425	17
Cnidaria	Hydrozoa	Bougainvillia muscus	34	20.9	mg WW	0.0209	g	0.341801	0.058	mmol O2 ind-1 h-1	0.00146	18
Cnidaria	Hydrozoa	Clytia hemisphaerica	28	25.8	mg WW	0.0258	g	0.366659	0.04	mmol O2 ind-1 h-1	0.000988	18
Cnidaria	Hydrozoa	Colobonema sericeum	6	13.71	g WW	13.71	g	2.96923	4.74	ml O2 h-1 g WW-1	0.0650814	1
Cnidaria	Hydrozoa	Colobonema sericeum	10	5.858	g WW	5.858	g	2.23645	0.199	mmol O2 g-1 h-1	0.0270852	17
Cnidaria	Hydrozoa	Crossota sp. A	5	0.13655	g WW	0.13655	g	0.638943	0.168	mmol O2 g-1 h-1	0.000523587	17
Cnidaria	Hydrozoa	Diphyes antarctica	-1.75	2.085	g WW	2.085	g	1.58499	5.6	ml O2 ind-1 h-1	0.0056	9
Cnidaria	Hydrozoa	Eperetmus typus	10	99	mg DW	2.48	g	1.67934	0.25	ml O2 h-1 mg DW-1	0.02475	15
Cnidaria	Hydrozoa	Eutonina indicans	10	43	mg DW	1.13	g	1.29229	0.28	ml O2 h-1 mg DW-1	0.01204	15
Cnidaria	Hydrozoa	Gonionemus vertens	10	31	mg DW	0.674	g	1.08783	0.58	ml O2 h-1 mg DW-1	0.01798	15
Cnidaria	Hydrozoa	Mitrocoma cellularia	15	310	mg DW	8.61	g	2.54276	0.16	ml O2 h-1 mg DW-1	0.0496	15
Cnidaria	Hydrozoa	Nemopsis bachei	12	118.4	mg WW	0.1184	g	0.60928	0.127	mmol O2 ind-1 h-1	0.00297161	18
Cnidaria	Hydrozoa	Pantachogon sp. A	5	0.54235	g WW	0.54235	g	1.01182	0.259	mmol O2 g-1 h-1	0.00591136	17
Cnidaria	Hydrozoa	Phialidium gregarium	10	16	mg DW	0.41	g	0.921743	0.26	ml O2 h-1 mg DW-1	0.00416	15
Cnidaria	Hydrozoa	Sarsia princeps	10	15	mg DW	0.395	g	0.910364	0.16	ml O2 h-1 mg DW-1	0.0024	15
Cnidaria	Hydrozoa	Solmissus incisus	6	25.45	g WW	25.5	g	3.65148	5.547	ml O2 h-1 g WW-1	0.141449	1
Cnidaria	Hydrozoa	Stomotoca atra	15	24	mg DW	0.558	g	1.02146	0.31	ml O2 h-1 mg DW-1	0.00744	15
Cnidaria	Hydrozoa	Tetrorchis erythrogaster	5	0.4369	g WW	0.4369	g	0.941474	0.117	mmol O2 g-1 h-1	0.00117	17
Cnidaria	Hydrozoa	Vampyrocrossota childressi	5	0.3499	g WW	0.3499	g	0.87431	0.14	mmol O2 g-1 h-1	0.00112	17
Cnidaria	Scyphozoa	Aurelia aurita	15	120	mm BD	58.3	g	4.81024	lnR=-1.634+0.93*lnDW(mg)		0.24	19
Cnidaria	Scyphozoa	Aurelia aurita	28	1330	g WW	1330	g	13.6411	1.39*WW(g)^0.708	ml O2 ind-1 h-1	9.42954	20
Cnidaria	Scyphozoa	Aurelia aurita	20	0.56	g C	622	g	10.5886	0.167*DW(g)^1.002	ml O2 ind-1 h-1	2.5186	21
Cnidaria	Scyphozoa	Aurelia labiata	10	490	mg DW	11.7	g	2.81641	0.14	ml O2 h-1 mg DW-1	0.0686	15
Cnidaria	Scyphozoa	Cyanea capillata	10	240	mg DW	10.3	g	2.69928	0.48	ml O2 h-1 mg DW-1	0.1152	15
Cnidaria	Scyphozoa	Cyanea capillata	6	145.91	g WW	146	g	6.53203	3.169	ml O2 h-1 g WW-1	0.462674	1
Cnidaria	Scyphozoa	Nemopilema nomurai	24	7800	g WW	7800	g	24.5983	0.549*WW(g)	ml O2 d-1	178.425	22
Cnidaria	Scyphozoa	Paraphyllina ransoni	5	0.26595	g WW	0.26595	g	0.797912	0.33	mmol O2 g-1 h-1	0.00202	17
Cnidaria	Scyphozoa	Pelagia noctiluca	18	147.9	mg DW	5.7	cm3	2.21617	1.02	ml O2 h-1 mg DW-1	0.151	23
Cnidaria	Scyphozoa	Periphylla periphylla	5	22.93	g WW	22.93	g	3.52445	0.152	mmol O2 g-1 h-1	0.0795	17
Cnidaria	Scyphozoa	Poralia rufescens	6	298.25	g WW	298.25	g	8.28794	0.429	ml O2 h-1 g WW-1	0.127949	1
Cnidaria	Scyphozoa	Rhizostoma pulmo	26	1213	g WW	1213	g	13.2288	0.025*WW(g)^0.993	ml O2 h-1	28.8545	22
Cnidaria	Scyphozoa	Stomolophus meleagris	30	1000	gWW	1000	g	12.4042	0.05	ml O2 h-1 gWW-1	50	15
Ctenophora	Tentaculata	Agmayeria tortugensis	6	46.34	gWW	46.34	g	4.45587	5.828 ul O2 h-1 g WW-1	ul O2 ind-1 h-1	0.27007	1
Ctenophora	Tentaculata	Bathocyroe fosteri	6	24.38	gWW	24.38	g	3.59722	2.163 ul O2 h-1 g WW-1	ul O2 ind-1 h-1	0.0527339	1
Ctenophora	Nuda	Beroe ovata	25	40	mm	9.344	g	2.61305	RR (mg O2 ind-1 h-1)=0.211*WW(g)^0.9	mg O2 ind-1 h-1	1.20551	13
Ctenophora	Nuda	Beroe ovata	21	1	g DW	33.67	g	4.00589	RR(ml O2 g-1 h-1)=0.341*DW^1.04	ml O2 ind-1 h-1	0.341	8
Ctenophora	Nuda	Beroe ovata	26.1	3.87	gWW	3.87	g	1.94784	0.0206	ml O2 ind-1 h-1	0.0206	24
Ctenophora	Nuda	Beroe ovata	21	55000	mg WW	55	g	4.71772	RR(ug O2 ind-1 h-1)=0.0063*WW(mg)^1.078	ug O2 ind-1 h-1	1.22468	25
Ctenophora	Nuda	Beroe sp	-1.7	71.17	gWW	71.17	g	5.14091	40.9	ul O2 ind-1 h-1	0.0409	9
Ctenophora	Nuda	Beroe sp	-0.8	401.58	mg DW	13.5212	g	2.95554	15.4	ul O2 ind-1 h-1	0.0154	10
Ctenophora	Tentaculata	Bolinopsis vitrea	25	70	mm	34.4448	g	4.03638	RR (mg O2 ind-1 h-1)=0.034*WW(g)^0.64	mg O2 ind-1 h-1	0.250408	13
Ctenophora	Tentaculata	Eurhamphaea vexilligera	25	60	mm	16.7667	g	3.17524	RR (mg O2 ind-1 h-1)=0.078*WW(g)^1.12	mg O2 ind-1 h-1	1.40244	13
Ctenophora	Tentaculata	Ocyropsis	25	40	mm	9.31345	g	2.6102	RR (mg O2 ind-1 h-1)=0.154*WW(g)^0.97	mg O2 ind-1 h-1	1.02558	13
Ctenophora	Tentaculata	Pleurobrachia pileus	15	0.2	gWW	0.157601	g	0.670217	RR (ul O2 (ugC)-1 d-1	ul O2 ind-1 d-1	0.00558	26
Annelida	Polychaeta	Tomopteris carpenteri	-0.8	137.93	mg DW	0.493	cm3	0.980155	42.8	ml O2 ind-1 h-1	0.0428	10
Arthropoda	Amphipoda	Hyperia gaudichaudii	-0.8	105.3	mg DW	0.376	cm3	0.895528	22.33	ml O2 ind-1 h-1	0.02233	10
Arthropoda	Amphipoda	Parathemisto gaudichaudii	-1	13.12	mg DW	0.0469	cm3	0.447477	5.56	ml O2 ind-1 h-1	0.00556	10
Arthropoda	Amphipoda	Viblia antarctica	-1.1	12.14	mg DW	0.0434	cm3	0.436058	6.07	ml O2 ind-1 h-1	0.00607	10
Arthropoda	Copepoda	Neocalanus plumchrus V	7.3	0.785	mg DW	0.00294375	cm3	0.17785	0.68	ml O2 ind-1 h-1	0.00068	27
Arthropoda	Copepoda	Calanus propinquus	-1	1.043	mg DW	0.00391125	cm3	0.195519	1.179	ml O2 ind-1 h-1	0.001179	27
Arthropoda	Copepoda	Calanus acutus V	-0.2	0.394	mg DW	0.0014775	cm3	0.141342	0.211	ml O2 ind-1 h-1	0.000211	27
Arthropoda	Copepoda	Metridia gerlachei	-1.4	0.265	mg DW	0.00099375	cm3	0.12384	0.32	ml O2 ind-1 h-1	0.00032	27
Arthropoda	Copepoda	Calanus finmarchicus	0.1	0.387	mg DW	0.00145125	cm3	0.1405	0.328	ml O2 ind-1 h-1	0.000328	27
Arthropoda	Copepoda	Calanus glacialis	2.3	0.474	mg DW	0.0017775	cm3	0.150325	0.616	ml O2 ind-1 h-1	0.000616	27
Arthropoda	Copepoda	Metridia longa	0.1	0.353	mg DW	0.00132375	cm3	0.13626	0.4106	ml O2 ind-1 h-1	0.0004106	27
Arthropoda	Copepoda	Neocalanus plumchrus V	7.3	0.785	mg DW	0.00294375	cm3	0.17785	0.68	ml O2 ind-1 h-1	0.00068	27
Arthropoda	Copepoda	Metridia pacifica	8.2	0.148	mg DW	0.000555	cm3	0.101986	0.382	ml O2 ind-1 h-1	0.000382	27
Arthropoda	Copepoda	Neocalanus gracilis	19.7	0.5	mg DW	0.001875	cm3	0.153024	1.64	ml O2 ind-1 h-1	0.00164	27
Arthropoda	Copepoda	Euchaeta marina	24	0.291	mg DW	0.00109125	cm3	0.127764	1.338	ml O2 ind-1 h-1	0.001338	27
Arthropoda	Copepoda	Undinulla vulgaris	27.6	0.167	mg DW	0.00062625	cm3	0.106176	1.399	ml O2 ind-1 h-1	0.001399	27
Arthropoda	Copepoda	Eucalanus subcrassus	24	0.104	mg DW	0.00039	cm3	0.0906715	0.655	ml O2 ind-1 h-1	0.000655	27
Arthropoda	Copepoda	Eucalanus attenuatus	27.4	0.137	mg DW	0.00051375	cm3	0.0993946	0.905	ml O2 ind-1 h-1	0.000905	27
Arthropoda	Copepoda	Labidocera acuta	24	0.233	mg DW	0.00087375	cm3	0.118641	1.89	ml O2 ind-1 h-1	0.00189	27
Arthropoda	Copepoda	Labidocera nerii	26.4	0.221	mg DW	0.00082875	cm3	0.116568	1.515	ml O2 ind-1 h-1	0.001515	27
Arthropoda	Copepoda	Potella danae	26.4	0.7	mg DW	0.002625	cm3	0.171185	3.43	ml O2 ind-1 h-1	0.00343	27
Arthropoda	Copepoda	Rhincalanus gigas	-1.7	1.08	mg DW	0.00405	cm3	0.197803	0.438	ml O2 ind-1 h-1	0.000438	27
Arthropoda	Copepoda	Calanus hyperboreus	1.3	3.95	mg DW	0.0148125	cm3	0.304747	1.485	ml O2 ind-1 h-1	0.001485	27
Arthropoda	Copepoda	Neocalanus cristatus	6.3	1.587	mg DW	0.00595125	cm3	0.224878	1.67	ml O2 ind-1 h-1	0.00167	27
Arthropoda	Copepoda	Eucalanus bungii	6	1.01	mg DW	0.0037875	cm3	0.193435	0.795	ml O2 ind-1 h-1	0.000795	27
Arthropoda	Decapoda	Chrorismus antarcticus	-1.7	593.9	mg DW	2.12	cm3	1.59381	54.5	ml O2 ind-1 h-1	0.0545	9
Arthropoda	Euphausiacea	Euphausia crystallorophias	-1.7	46.93	mg DW	0.168	cm3	0.684644	24.9	ml O2 ind-1 h-1	0.0249	9
Arthropoda	Euphausiacea	Euphausia superba	-1.6	350.7	mg DW	1.25	cm3	1.3365	119	ml O2 ind-1 h-1	0.119	9
Arthropoda	Euphausiacea	Euphausia superba	-1	353.78	mg DW	1.26	cm3	1.34005	123.57	ml O2 ind-1 h-1	0.12357	10
Arthropoda	Euphausiacea	Euphausia triacantha	-0.8	22.97	mg DW	0.082	cm3	0.539068	8.35	ml O2 ind-1 h-1	0.00835	10
Arthropoda	Euphausiacea	Thysanoessa inermis	1.9	34.78	mg DW	0.124	cm3	0.618738	13.77	ml O2 ind-1 h-1	0.01377	16
Arthropoda	Mysid	Antarctomysis maxima	-1.6	170.5	mg DW	0.609	cm3	1.05168	29.4	ml O2 ind-1 h-1	0.0294	9
Mollusca	Cephalopoda	Dosidicus gigas	5	12200	g WW	6440	cm3	23.0765	3.5	mmol O2 g-1 h-1	975	28
Mollusca	Cephalopoda	Illex illecebrosus	15	400	g WW	211	cm3	7.38503	313	ml O2 kg-1 h-1	125.2	29
Mollusca	Cephalopoda	Illex illecebrosus	5	600	g WW	316.929	cm3	8.45745	4	mmol O2 g-1 h-1	28.9341	28
Mollusca	Cephalopoda	Loligo forbesi	5	1004	g WW	530	cm3	10.0385	4.62	mmol O2 g-1 h-1	106	28
Mollusca	Cephalopoda	Loligo opalescens	5	41	g WW	21.7	cm3	3.46028	5.66	mmol O2 g-1 h-1	5.3	28
Mollusca	Cephalopoda	Loligo pealei	5	100	g WW	52.8	cm3	4.65396	7.7	mmol O2 g-1 h-1	17.6	28
Mollusca	Cephalopoda	Lolliguncula brevis	5	41.1	g WW	21.7	cm3	3.46028	3.86	mmol O2 g-1 h-1	3.62	28
Mollusca	Cephalopoda	Lolliguncula brevis	5	40	g WW	21.1286	cm3	3.42964	6.58	mmol O2 g-1 h-1	3.1731	28
Mollusca	Cephalopoda	Psychroteuthis sp.	-0.8	64.44	mg DW	0.23	cm3	0.760209	23.7	ml O2 ind-1 h-1	0.0237	9
Mollusca	Cephalopoda	Sepioteuthis lessoniana	5	3.6	g WW	1.90157	cm3	1.53708	10.45	mmol O2 g-1 h-1	0.453541	28
Mollusca	Cephalopoda	Sthenoteuthis oualaniensis	5	750	g WW	396	cm3	9.10921	2.41	mmol O2 g-1 h-1	41.3	28
Mollusca	Cephalopoda	Sthenoteuthis pteropus	5	1300	g WW	687	cm3	10.9453	2.9	mmol O2 g-1 h-1	86	28
Mollusca	Pteropoda	Limacina antarctica	-0.9	6.45	mg DW	0.054661	cm3	0.470909	3.22	ml O2 ind-1 h-1	0.00322	10
Mollusca	Pteropoda	Clione antarctica	-1.3	25.34	mg DW	0.214746	cm3	0.743018	6.31	ml O2 ind-1 h-1	0.00631	10
Mollusca	Pteropoda	Cleodora sulcata	-1.1	54.74	mg DW	0.463898	cm3	0.960479	22.2	ml O2 ind-1 h-1	0.0222	10
Chaetognatha	Sagittidae	Sagitta elegans	-0.3	4.5	mg DW	0.0161	cm3	0.313332	1.41	ml O2 ind-1 h-1	0.00141	16
Chordata	Pisces	Maurolicus muelleri	12	1327	mg WW	13.2	cm3	2.93195	451	ml O2 mg WW-1 h-1	0.451	30
Chordata	Pisces	Merlangius merlangus	10	297	g WW	2830	cm3	17.5448	59.2*WW(kg)^0.2+30.3*WW(kg)^-0.2*U^2.70	mg O2 kg-1 h-1	82.9	31
Chordata	Pisces	Pollachius virens	10	485	g WW	4420	cm3	20.3558	58.6*WW(kg)^0.2+50.9*WW(kg)^-0.2*U^1.63	mg O2 kg-1 h-1	123	31
Chordata	Pisces	Sardinops caerulea	19	189	g WW	1840	cm3	15.1996	0.3	0.3 ml O2 mg WW-1 h-1	552	30

## Sheet: Excretion
Phylum	Class or Order	Species	Temp (°C)	Size as reported	Units	WW or vol	Units	ESD (cm)	Excretion rate	Unit	Excretion (mmol NH4+-N ind-1 h-1)	Source
Cnidaria	Hydrozoa	Clytia	21	11	mm BD	0.0538821	g	0.4686	0.716	mg at NH4+ ind-1 d-1	0.00213095	32
Cnidaria	Hydrozoa	Diphyes	22	2037	ug DW	0.0492029	g	0.454623	49.4	ng N ind-1 h-1	0.00352857	33
Cnidaria	Scyphozoa	Aurelia aurita	20	885	gWW	885	g	11.9112	848.964	mmol NH4+ ind-1 d-1	35.3735	34
Cnidaria	Scyphozoa	Aurelia aurita	28	1330	gWW	1330	g	13.6434	1430.64	mmol NH4+ ind-1 d-1	59.6099	34
Cnidaria	Scyphozoa	C. quinquecirrha	27	1.53652	g DW	85.36	g	5.46255	5.83	mmol NH4+ ind-1 d-1	5.83	35
Cnidaria	Scyphozoa	C.quin	20	2.826	gDW	297.47	g	8.28177	9.85012	mg at NH4+ ind-1 h-1	0.70358	36
Cnidaria	Scyphozoa	Catostylus	25	2161	gWW	2161	g	16.0395	1555	mg NH4+ kg WW-1 h-1	240.025	37
Cnidaria	Scyphozoa	Pelagia noctiluca	20	28	cm3	28	g	3.76731	3.09251	ug at NH4 h-1	0.220894	38
Cnidaria	Scyphozoa	Pelagia noctiluca	19	1.46	g DW	20.28	g	3.38326	28.8	mmol NH4+ g DW-1 d-1	1.752	39
Ctenophora	Tentaculata	Bathycroe fosteri	10.5	1.6	g DW	44.0771	g	4.38244	Excretion=1.952*DW(g)^0.742	ug At-NH4+-N ind-1 h-1	0.00763995	40
Ctenophora	Nuda	Beroe ovata	25	50	mm	15.4541	g	3.09025	R(mg O2 ind-1 h-1)=1.17*DW(mg)^0.82	ug at NH4-N ind-1 h-1	0.0520231	13
Ctenophora	Nuda	Beroe sp.	-0.8	401.58	mg DW	10.1924	g	2.68992	2.213	ug N ind-1 h-1	0.158071	10
Ctenophora	Tentaculata	Bolinopsis vitrea	25	100	mm	76.5415	g	5.26756	R(mg O2 ind-1 h-1)=1.17*DW(mg)^0.76		0.0264005	13
Ctenophora	Tentaculata	Eurhamphaea vexilligera	25	100	mm	49.3521	g	4.55072	R(mg O2 ind-1 h-1)=0.33*DW(mg)^0.93	ug at NH4-N ind-1 h-1	0.040539	13
Ctenophora	Tentaculata	Mnemiopsis leidyi	23	4.37	g DW	460.147	g	9.57798	Excretion=1.952*DW(g)^0.742	ug At-NH4+-N ind-1 h-1	0.416475	36
Ctenophora	Tentaculata	Mnemiopsis leidyi	27	0.7	g DW	73.8316	g	5.20465	Excretion=1.48*DW(g)^0.79	umol NH4+ ind-1 h-1	1.11658	35
Ctenophora	Tentaculata	Mnemiopsis mccradyi	22	28	g WW	28	g	3.76731	Excretion=0.7 ug-at NH4+-N g-1 DW h-1		0.86828	41
Ctenophora	Tentaculata	Ocryopsis spp.	25	43	mm	14.6391	g	3.03495	R(mg O2 ind-1 h-1)=0.74*DW(mg)^1.06	ug at NH4-N ind-1 h-1	0.0270426	13
Annelida	Polychaeta	Tomopteris carpenteri	-0.8	137.93	mg DW	0.492607	cm3	0.979832	4.17	mg N ind-1 h-1	0.297857	10
Arthropoda	Amphipoda	Themisto pacifica	5	1.06	mg DW	0.00378571	cm3	0.193363	0.09	mg N ind-1 h-1	0.00642857	42
Arthropoda	Amphipoda	Themisto japonica	5	2.03	mg DW	0.00725	cm3	0.240125	0.22	mg N ind-1 h-1	0.0157143	42
Arthropoda	Amphipoda	Primno abyssalis	5	6.49	mg DW	0.0231786	cm3	0.35374	0.21	mg N ind-1 h-1	0.015	42
Arthropoda	Amphipoda	Cyphocaris challengeri	5	5.75	mg DW	0.0205357	cm3	0.33975	0.072	mg N ind-1 h-1	0.00514286	42
Arthropoda	Amphipoda	Parathemitso gaudichaudii	-1	13.12	mg DW	0.0468571	cm3	0.447281	0.674	mg N ind-1 h-1	0.0481429	10
Arthropoda	Amphipoda	Viblia antarctica	-1.1	12.14	mg DW	0.0433571	cm3	0.435855	0.43	mg N ind-1 h-1	0.0307143	10
Arthropoda	Amphipoda	Hyperia gaudichaudii	-0.8	105.3	mg DW	0.376071	cm3	0.89552	2.64	mg N ind-1 h-1	0.188571	10
Arthropoda	Copepods	Calanus propinquus	-0.8	1.04	mg DW	0.00371429	cm3	0.19214	0.107	mg N ind-1 h-1	0.00764286	10
Arthropoda	Copepods	Metridia gerlachei	-1.1	0.265	mg DW	0.000946429	cm3	0.121812	0.0312	mg N ind-1 h-1	0.00222857	10
Arthropoda	Decapoda	Chorismus antarcticus	-1.7	593.9	mg DW	2.12107	cm3	1.59405	3.46	mg N ind-1 h-1	0.247143	9
Arthropoda	Euphausiacea	Euphausia superba	-1.6	252.5	mg DW	0.901786	cm3	1.19863	4.09	mg N ind-1 h-1	0.292143	9
Arthropoda	Euphausiacea	Euphausia superba	-1	353.78	mg DW	1.2635	cm3	1.34125	10.28	mg N ind-1 h-1	0.734286	10
Arthropoda	Euphausiacea	Euphausia triacantha	-0.8	22.97	mg DW	0.0820357	cm3	0.539082	0.863	mg N ind-1 h-1	0.0616429	10
Mollusca	Cephalopoda	Loligo forbesi	11.75	25.2667	cm	337.877	cm3	8.64095	14.4	mg N g-1 h-1	759.086	43

## Sheet: Growth
Phylum	Class or Order	Species	Temp	Size T0	Size T1	Units	Days	mmax		Geometric mean weight (mg C ind-1)	Geometric mean WW or Vol	Units	ESD (cm)	Source
Cnidaria	Hydrozoa	Aequorea victoria	11.6					0.103	10.4798	606.7	0.102511	g	0.580644	44
Cnidaria	Hydrozoa	Sarsia tubulosa	11.5					0.603	11.2513	13.4	0.00526316	g	0.215811	44
Cnidaria	Hydrozoa	Sarsia tubulosa	1.6	0.3	1.6	mg C	10	0.167398	11.1083		0.00025221	g	0.078388	45
Cnidaria	Hydrozoa	Moerisia lyonsi	22	0.8	4.5	mm BD	16	0.123996	10.1561		2.12357	g	1.59467	46
Cnidaria	Scyphozoa	Aurelia aurita	12.2					0.314	10.9397	747.6	0.2492	g	0.780732	44
Cnidaria	Scyphozoa	Aurelia aurita	15	0.08	0.98	mg DW	10	0.25	10.7295	0.28	0.0073107	g	0.240793	47
Cnidaria	Scyphozoa	Aurelia aurita	23.5	28	47	mm BD	4	0.375897	10.5818		2.98152	g	1.78564	48
Cnidaria	Scyphozoa	Aurelia aurita	10	5	88	mm BD	35	0.225	10.8839		1.08825	g	1.27612	49
Cnidaria	Scyphozoa	Aurelia aurita	22.75	0.0781	1.2311	g WW	33	0.084	9.95888		0.310079	g	0.839736	50
Cnidaria	Scyphozoa	Aurelia aurita	17	6.3486	7.4405	cm BD	4.36	0.103	10.2662		0.0308155	g	0.388966	51
Cnidaria	Scyphozoa	Aurelia aurita	14	6.7	48.5	mm BD	31	0.17879	10.6234		0.364453	g	0.886201	52
Cnidaria	Scyphozoa	Aurelia aurita	9	0.1	66.6	mg C	41	0.158568	10.7729		0.000860233	g	0.117996	45
Cnidaria	Scyphozoa	Catostylus mosaicus	22	60	160	mm BD	16	0.117	10.1308		409	g	9.20908	53
Cnidaria	Scyphozoa	Chrysaora quinquecirrah	23					0.740143	10.8946	9.32	0.0088374	g	0.256507	44
Cnidaria	Scyphozoa	Cotylorhiza tuberculata	25	22	53	mm BD	3	0.88	10.8958		3.53895	g	1.89063	54
Cnidaria	Scyphozoa	Cyanea sp.	4.5	50	72	mm BD	15	0.0811939	10.6698		12.2751	g	2.8619	55
Cnidaria	Scyphozoa	Nemopilema nomurai	25	1.5	29	g WW	28	0.10578	9.97569		6.59545	g	2.32664	56
Ctenophora	Nuda	Beroe ovata	26	3.17	11.8	g WW	14	0.328592	10.4313		6.11604	g	2.26884	24
Ctenophora	Tentaculata	Bolinopsis infundibulum	16					0.376	10.8675	15577.2	25.178	g	3.63624	44
Ctenophora	Tentaculata	Mnemiopsis leidyi	26.3	0.19	0.9234	ml	4	0.39526	10.5006		0.418863	ml	0.928273	57
Ctenophora	Tentaculata	Mnemiopsis mccradyi	26					0.78	10.8068	44.21	0.0522497	g	0.46382	44
Ctenophora	Tentaculata	Pleurobrachia bachei	13					0.51	11.1184	0.1	6.85725e-05	g	0.0507825	44
Ctenophora	Tentaculata	Pleurobrachia bachei	14.2					0.204	10.6727	248.2	0.170197	g	0.687549	44
Ctenophora	Tentaculata	Pleurobrachia pileus	15	0.159622	0.209099	g WW	3	0.09	10.2858		0.182693	g	0.703979	26
Arthropoda	Amphipoda	Calliopius laeviusculus	8					0.13	10.7278	15	0.000125	cm3	0.0620345	44
Arthropoda	Euphausida	Euphausia pacifica	8					0.12	10.693	11.1	9.25e-05	cm3	0.0561105	44
Arthropoda	Euphausida	Euphausia pacifica	11.5					0.228	10.8289	2.54	9.25e-05	cm3	0.0343202	44
Arthropoda	Euphausida	Euphausia superba	0.8					0.0086	9.85373	14953	0.124608	cm3	0.619682	44
Arthropoda	Euphausida	Thermisto japonica	7					0.1237	10.7477	6.04	5.03333e-05	cm3	0.0458089	44
Mollusca	Cephalopoda	Loligo pealei	20.5	72.2	130	g WW	28	0.0211405	9.44431		53.8361	cm3	4.68456	58
Mollusca	Cephalopoda	Loligo plei	20.5	13	39.2	g WW	33	0.033	9.63771		12.5203	cm3	2.88083	58
Chaetognatha	Chaetognatha	Pterosagitta draco	18.5					0.065	10.0084	13.16	0.000109667	cm3	0.0593866	44
Chaetognatha	Chaetognatha	Sagitta elegans	8.3					0.153	10.7861	87.6	0.00073	cm3	0.111713	44
Chaetognatha	Chaetognatha	Sagitta hispida	21					0.25	10.4982	4.53	3.775e-05	cm3	0.0416202	44
Chaetognatha	Chaetognatha	Sagitta hispida	21					0.135	10.2306	36.8	0.000306667	cm3	0.0836664	44
Chordata	Pisces	Engraulis mordax	16.2	0.4	2	cm SL	30	0.160944	10.4912		0.0149882	cm3	0.3059	59
Chordata	Pisces	Gobiusculus flavescens	16.3	3.5	21	mg DW	21	0.0853219	10.2117		0.0306186	cm3	0.388	60
Chordata	Pisces	Istiophorus platypterus	29	0.251368	1.09984	cm SL	12	0.369	10.3733		0.00304491	cm3	0.1798	61
Chordata	Pisces	Rachycentron canadum	26.4	0.61	1.52	cm SL	9	0.304336	10.3834		0.0187014	cm3	0.3293	62
Chordata	Pisces	Scomber japonicus	22.1	0.89	2.41	cm SL	5	0.597696	10.8354		0.0657999	cm3	0.5009	63
Chordata	Pisces	Gadus morhua	12	400	585	g WW	33	0.0114433	9.50938		4333.5	cm3	20.226	64

## Sheet: Longevity
Phylum	Class or Order	Species	Location	Date used for SST	SST	Max size	Units	Volume or WW	Units	ESD (cm)	Longevity (days)	Source
Cnidaria	Hydrozoa	Mitrocomella polydiademata	Firth of Clyde UK	April (1981)	13	16.4	mm BD	2.81691	g	1.75216	120	65
Cnidaria	Hydrozoa	Mitrocomella polydiademata	San Juan Island, USA	1991-07-01	13	17	mm BD	3.02679	g	1.79464	60	66
Cnidaria	Hydrozoa	Mitrocoma cellularia	San Juan Island, USA	1991-07-01	13	70	mm BD	102.639	g	5.80872	180	66
Cnidaria	Hydrozoa	Gonionemus vertens	San Juan Island, USA	1991-07-01	13	20	mm BD	8.37867	g	2.51984	90	66
Cnidaria	Hydrozoa	Clytia gregarium	San Juan Island, USA	1991-07-01	13	20	mm BD	8.37867	g	2.51984	75	66
Cnidaria	Hydrozoa	Clytia hemispherica	Southampton Water, UK	1990-07-01	16	16	mm BD	0.153211	g	0.66387	180	67
Cnidaria	Hydrozoa	Aglantha digitale	White Sea, Russia	1990-07-01	7	3.89	mg DW	0.075534	g	0.524447	365	68
Cnidaria	Hydrozoa	Aequorea victoria	San Juan Island, USA	1991-07-01	13	65	mm BD	12.3174	g	2.86519	180	66
Cnidaria	Scyphozoa	Aurelia aurita	Urazoko Bay, Japan	1981-07-01	24	310	mm BD	1254.57	g	13.3805	547.5	50
Cnidaria	Scyphozoa	Aurelia aurita	Southampton Water, UK	1990-07-01	16	105	mm	52.1349	g	4.63469	330	69
Cnidaria	Scyphozoa	Aurelia aurita	Southampton Water, UK	1990-07-01	16	140	mm	121.394	g	6.14294	120	70
Cnidaria	Scyphozoa	Aurelia aurita	Kiel Bight, Germany	2009-07-01	16	300	mm BD	1139.35	g	12.9576	120	71
Cnidaria	Scyphozoa	Aurelia aurita	Tomales Bay, USA	1990-07-01	14	150	mm BD	148.672	g	6.57234	547.5	51
Cnidaria	Scyphozoa	Aurelia aurita	Kiel Bight, Germany	2009-07-01	16	197	mm BD	331.144	g	8.58316	270	52
Cnidaria	Scyphozoa	Catostylus mosaicus	Botany Bay, Australia	1997-01-01	22	280	mm BD	5053.52	g	21.2897	390	53
Cnidaria	Scyphozoa	Chrysaora quinquecirrha	Chesapeake Bay, USA	From paper	28	200	mm BD	6618.2	g	23.2926	180	72
Cnidaria	Scyphozoa	Cotylorhiza tuberculata	Greece	1982-07-01	24	40	cm BD	7404.16	g	24.1804	180	54
Cnidaria	Scyphozoa	Cyanea sp.	Niantic River, USA	1982-07-01	21	130	mm BD	227.641	g	7.57518	150	55
Cnidaria	Scyphozoa	Nemopilema nomurai	Sea of Japan	2005-07-01	25	96	kg WW	96000	g	56.8056	300	73
Cnidaria	Scyphozoa	Pelagica noctiluca	Northern Adriatic Sea	1982-07-01	24	80	mm BD	46.2342	g	4.4528	270	74
Cnidaria	Scyphozoa	Phyllorhiza punctata	Southern Brazil	2003-01-01	25	35	cm BD	2095.53	g	15.8759	120	75
Cnidaria	Scyphozoa	Phyllorhiza punctata	Swan-Canning Estuary, Australia	1994-01-01	22	35	cm BD	2095.53	g	15.8759	180	76
Cnidaria	Scyphozoa	Phyllorhiza punctata	Mississippi Sound, USA	2000-07-01	30	62	cm BD	12526.4	g	28.8124	150	77
Arthropoda	Euphausida	Euphausa triacantha	Ross Sea, Antarctica	2005-01-01	1	40	mm	0.75276	cm3	1.12859	1095	78
Arthropoda	Euphausida	Euphausia crystallorophias	Ross Sea, Antarctica	2005-01-01	1	36	mm	1.5519	cm3	1.43638	1825	78
Arthropoda	Euphausida	Euphausia superba	Ross Sea, Antarctica	2005-01-01	1	55	mm	4.7545	cm3	2.08617	2190	78
Arthropoda	Euphausida	Thysanoessa inermis	North Atlantic	1993-07-01	3	29	mm TL	0.510868	cm3	0.991793	730	79
Arthropoda	Euphausida	Thysanoessa inermis	Barents Sea	1993-07-01	7	25.6	mm TL	0.351427	cm3	0.875515	1460	80
Arthropoda	Euphausida	Thysanoessa longicaudata	Barents Sea	1993-07-01	7	18.5	mm TL	0.132626	cm3	0.632698	730	80
Arthropoda	Euphausida	Thysanoessa sp.	Ross Sea, Antarctica	2005-01-01	1	32	mm	0.56556	cm3	1.02599	1460	78
Mollusca	Cephalopoda	Abralia trigonura	Hawaii	1987-07-01	25	36	mm gladius length	4.52448	cm3	2.05197	188	81
Mollusca	Cephalopoda	Dosidiscus gigas	Gulf of California	1995-07-01	29	875	mm ML	64965.9	cm3	49.8727	386	82
Mollusca	Cephalopoda	Idiosepius notoides	Forteswcue Bay, Tasmania, Australia	2000-01-01	16	20	mm ML	0.775802	cm3	1.13999	115	83
Mollusca	Cephalopoda	Idiosepius paradoxus	southern Hokkaido, Japan	2005-07-01	17	11	mm ML	0.129074	cm3	0.626998	150	84
Mollusca	Cephalopoda	Idiosepius pygmaeus	Townsville, Australia	1986-01-01	29	18	mm ML	0.56556	cm3	1.02599	79	85
Mollusca	Cephalopoda	Illex argentinus	Patagonia, Argentina	1991-01-01	12	350	mm ML	4157.82	cm3	19.9493	320	86
Mollusca	Cephalopoda	Illex coindetii	Strait of Sicily, Italy	1995-07-01	26	240	mm ML	1340.59	cm3	13.6795	240	87
Mollusca	Cephalopoda	Loligo gahi	Falkland Islands	1995-01-01	9	300	mm ML	2618.33	cm3	17.0994	366	88
Mollusca	Cephalopoda	Loligo opalescens	Santa Catalina Islands, California	1997-07-01	14	140	mm ML	266.1	cm3	7.97978	243	89
Mollusca	Cephalopoda	Loligo pealei	Narragansett Bay, USA	1992-07-01	18	300	mm ML	2618.33	cm3	17.0994	295	90
Mollusca	Cephalopoda	Loligo vulgaris	West Saharan Shelf	1987-07-01	23	498	mm ML	11977	cm3	28.3848	396	91
Mollusca	Cephalopoda	Loliolus noctiluca	Western Port Bay, Australia	1993-01-01	18	59	mm ML	19.9167	cm3	3.36294	255	92
Mollusca	Cephalopoda	Photololigo edulis	East China Sea	2003-07-01	28	247	mm ML	1461.34	cm3	14.0785	261	93
Mollusca	Cephalopoda	Pterygioteuthis gemmata	Gulf of Guinea, Africa	1985-07-01	25	30	mm ML	2.61833	cm3	1.70998	77	94
Mollusca	Cephalopoda	Thysanoteuthis rhombus	Tropical Atlantic	1995-07-01	24	770	mm ML	44272.4	cm3	43.888	309	95
Chordata	Pisces	Anchoa compressa	Newport Bay, California	1985-07-01	21	13.3	cm SL	197.12	cm3	7.22026	2190	96
Chordata	Pisces	Anchoa delicatissima	Newport Bay, California	1985-07-01	21	8	cm SL	42.8988	cm3	4.34303	1095	96
Chordata	Pisces	Caranx crysos	Northern Gulf of Mesico	1985-07-01	28	70	cm TL	28738.8	cm3	38.0007	4015	96
Chordata	Pisces	Engraulis encrasicolus	62 N-37S			20	cm SL	670.293	cm3	10.8575	1095	96
Chordata	Pisces	Engraulis ringens	Western coast of S. America	1985-01-01	22	20	cm SL	670.293	cm3	10.8575	1095	96
Chordata	Pisces	Harengula jaguana	Caribbean	1995-07-01	29	21.2	cm SL	798.33	cm3	11.5089	1095	96
Chordata	Pisces	Onchorynchus nerka	Alaska	1995-07-01	10	84	cm TL	49660.7	cm3	45.6008	2920	96
Chordata	Pisces	Rastrelliger kanagurta	Coral triangle	1995-01-01	28	35	cm FL	3592.35	cm3	19.0005	1460	96
Chordata	Pisces	Scomber japonicus	Coral triangle	1995-01-01	28	64	cm TL	21964.2	cm3	34.7436	6570	96
Chordata	Pisces	Scomber scombrus	Northern Atlantic		12	60	cm FL	18097.9	cm3	32.5721	21900	96
Chordata	Pisces	Thunnus alalunga	Tropics worldwide		29	140	cm FL	229911	cm3	76.0009	3285	96

## Sheet: Swimming velocity & Re
Phylum	Class or Family	Species	Temp	Size	units	WW or Vol	Units	ESD (cm)	Cruising velocity (cm s-1)	Reynolds Number	Source
Cnidaria	Cubozoa	Chiropsalmus sp.	28	10	cm	73.1901	g	5.18953	11.5	5683.78	97
Cnidaria	Hydrozoa	Aeginura grimaldii	ND	3	cm	0.5673	g	1.02704	2.15	210.299	98
Cnidaria	Hydrozoa	Aequorea victoria	ND	2.1 x 5	Height (cm) x Diameter (cm)	41.2	g	4.28493	0.9	367.28	99
Cnidaria	Hydrozoa	Aglantha digitale	ND	1.9	cm BH	0.0002521	g	0.0783767	2.2	16.4218	99
Cnidaria	Hydrozoa	Aglantha digitale	ND	2	cm BH	0.0002605	g	0.0792377	0.49	3.69776	Mills unpubl.
Cnidaria	Hydrozoa	Liriope tetraphylla	ND	2	cm	0.436	g	0.940764	2.9	259.83	100
Cnidaria	Hydrozoa	Phialidium gregarium	12	2	cm	0.126739	g	0.623195	3	178.056	10
Cnidaria	Hydrozoa	Sarsia sp.	ND	1	cm	0.245	g	0.776321	1.85	136.78	Mills unpubl.
Cnidaria	Hydrozoa	Solmissus sp.	ND	7	cm	47.06	g	4.47915	1.85	789.183	98
Cnidaria	Scyphozoa	Aurelia aurita	16	5.54	cm	10.0078	g	2.67358	1.25	318.284	102
Cnidaria	Scyphozoa	Aurelia aurita	11.5	1.6	cm BD	0.28687	g	0.81824	1.29	100.527	103
Cnidaria	Scyphozoa	Catostylus mosaicus	ND	20	cm	2244	g	16.2423	8.3	12839.1	104
Cnidaria	Scyphozoa	Chrysaora quinquecirrha	ND	10	cm BD	82.9156	g	5.4099	1.8	927.412	105
Cnidaria	Scyphozoa	Chrysaora quinquecirrha	21	5.45	cm BD	12.5097	g	2.88002	0.27	74.0577	106
Cnidaria	Scyphozoa	Cyanea capillata	22.5	3.9	cm BD	8.06835	g	2.48834	1.29	305.71	107
Cnidaria	Scyphozoa	Cyanea capillata	19	2.6	cm BD	2.62004	g	1.71035	0.71	115.652	108
Cnidaria	Scyphozoa	Linuche unguiculata	22.5	1.5	cm	6.9487	g	2.36746	1.325	298.751	107
Cnidaria	Scyphozoa	Nemopilema nomurai	16.2	160	cm	68000	g	50.6373	12	57871.2	109
Cnidaria	Scyphozoa	Phyllorhiza punctata	ND	2.8	cm BD	2.42	g	1.66566	1.73	274.438	110
Cnidaria	Scyphozoa	Stomolophus meleagris	22.5	3.3	cm BH	14.3382	g	3.01401	2.3	660.211	107
Cnidaria	Scyphozoa	Stomolophus meleagris	29.5	1000	g WW	1000	g	12.4062	20.57	24304.4	15
Ctenophora	Nuda	Beroe	ND	0.035	m	4.91185	g	2.10893	3.86111	775.508	111
Ctenophora	Nuda	Beroe cucumis	ND	11.0857	cm OA Length	64.2386	g	4.9687	3.58	1694.09	112
Ctenophora	Nuda	Beroe forskalii	ND	12.1333	cm OA Length	78568.6	g	53.1354	3.58	18116.6	112
Ctenophora	Tentaculata	Bolinopsis infundibulum	ND	8.4	cm OA Length	46.1388	g	4.44973	0.85	360.216	112
Ctenophora	Tentaculata	Mnemiopsis leidyi	24	4.2	cm	32.4468	g	3.95703	0.3	113.058	113
Arthropoda	Copepoda	Acartia clausi	ND	1	mm	8.37867e-05	cm3	0.0542903	0.6	3.1023	114
Arthropoda	Copepoda	Acartia granii female	22	1.34667	mm cephalothorax	0.000204623	cm3	0.0731107	0.33	2.29777	115
Arthropoda	Copepoda	Acartia hudsonica	12	1	mm	8.37867e-05	cm3	0.0542903	0.6	3.1023	116
Arthropoda	Copepoda	Acartia hudsonica	ND	1	mm	8.37867e-05	cm3	0.0542903	0.18	0.930691	114
Arthropoda	Copepoda	Acartia tonsa	ND	1	mm	8.37867e-05	cm3	0.0542903	0.25	1.29263	114
Arthropoda	Copepoda	Calanus finmarchicus	12	5	mm	0.0104733	cm3	0.271447	0.5	12.9261	116
Arthropoda	Copepoda	Centropages hamatus	ND	1	mm	8.37867e-05	cm3	0.0542903	0.53	2.74037	114
Arthropoda	Copepoda	Centropages typicus	ND	1	mm	8.37867e-05	cm3	0.0542903	0.2	1.0341	114
Arthropoda	Copepoda	Cyclops abyssorum	ND	1.1	mm	0.00011152	cm3	0.0597193	0.55	3.12815	114
Arthropoda	Copepoda	Cyclops vicinus	ND	1.5	mm	0.00028278	cm3	0.0814351	0.58	4.49832	114
Arthropoda	Copepoda	Diothiona oculata	ND	0.8	mm	4.28988e-05	cm3	0.0434323	0.35	1.44774	114
Arthropoda	Copepoda	Pseudocalanus elongatus female	16	1.05333	mm cephalothorax	9.79202e-05	cm3	0.0571857	0.2	1.08925	115
Arthropoda	Copepoda	Pseudocalanus minutus	ND	1.5	mm	0.00028278	cm3	0.0814351	0.24	1.86137	114
Arthropoda	Copepoda	Temora longicornis	12	3	mm	0.00226224	cm3	0.162869	0.61	9.46192	116
Arthropoda	Copepoda	Temora longicornis	ND	2	mm	0.000670293	cm3	0.10858	0.7	7.23866	114
Arthropoda	Copepoda	Temora longicornis female	16	0.986666	mm cephalothorax	8.04796e-05	cm3	0.0535664	0.14	0.714219	115
Arthropoda	Copepoda	Temora stylifera female	22	1.42667	mm cephalothorax	0.0002433	cm3	0.0774539	0.33	2.43426	115
Arthropoda	Euphausida	Callinectes sapoidus	ND	8	cm	10.7247	cm3	2.73595	16	4169.07	114
Arthropoda	Euphausida	Euphausia pacifica	ND	1.5	cm	0.070695	cm3	0.513	2.5	122.143	114
Arthropoda	Euphausida	Euphausia superba	ND	5	cm	2.61833	cm3	1.70998	6	977.131	114
Arthropoda	Euphausida	Gnathophausia ingens	ND	5.2	cm	2.94527	cm3	1.77838	7.5	1270.27	114
Arthropoda	Euphausida	Meganyctiphanes norvegica	ND	2.8	cm	0.459821	cm3	0.957594	10	911.994	114
Arthropoda	Euphausida	Palaemon adspersus	ND	2.7	cm	0.412293	cm3	0.923394	4.5	395.74	114
Arthropoda	Euphausida	Penaeus mergueinis	ND	10	cm	20.9467	cm3	3.41993	20	6514.16	114
Arthropoda	Euphausida	Thysanoessa raschii	7.1	2	cm	0.167573	cm3	0.683998	2	130.285	117
Chordata	Pisces	Acanthocybium solandri	ND	125	cm SL	163646	cm3	67.858	40	258507	96
Chordata	Pisces	Clupea harengus L.	13.5	25.3	cm	1356.86	cm3	13.7347	102.718	134362	118
Chordata	Pisces	Melanogrammus aeglefinus L.	ND	42	cm SL	6207.59	cm3	22.8006	70.9	153958	119
Chordata	Pisces	Pollachius virens L.	14.4	50	cm	10473.3	cm3	27.1435	110	284360	118
Chordata	Pisces	Sardinops sagax	19	6	cm	18.0979	cm3	3.25729	19.8	6142.31	120
Chordata	Pisces	Scomber scombrus L.	11.7	33	cm	3011.04	cm3	17.9148	115.5	197062	118
Chordata	Pisces	Thunnus albacares	ND	84	cm SL	49660.7	cm3	45.6008	65	282291	96
Chordata	Pisces	Thunnus thynnus	ND	213	cm SL	809681	cm3	115.629	349	3.8433e+06	96
